## What level of air filtration (ACH) is equivalent to an N95 respirator?

Devabhaktuni Srikrishna  
Patient Knowhow, Inc.  
[sri@patientknowhow.com](mailto:sri@patientknowhow.com)  
[www.patientknowhow.com](http://www.patientknowhow.com)

### Abstract

N95 respirators reduce risk of catching COVID-19 from an infected person both at near-field (e.g. < 6 feet) and far-field (e.g. > 6 feet). Air filtration is usually not effective at near-field, but emulating the far-field equivalent of N95 requires 95% reduction of particles (20x) from airborne particulate sources. A wide range of air change per hour (ACH) recommendations for air filtration exist ranging from 2 to 12 ACH (CDC, CDPH, etc.). Instead of inert airborne contaminant (e.g. salt water) which can be disruptive in occupied rooms, we describe a simpler procedure using an optical particle counter to track the decay of ambient aerosols (0.3  $\mu\text{m}$  diameter) and measure ACH from exponential decay coefficients in a room and a whole house. Surface deposition in an unventilated room without ventilation or filtration was measured to be 0.6 ACH using ambient aerosols. ACH was also measured to be 3 to 17 using low-noise generating HEPA purifiers (\$299-\$999, reported CADR 114 to 1360 cfm) and Do-It-Yourself (DIY) air purifiers (\$55-\$160, 1"-5", MERV 13-16, 1-filter and 4-filter Corsi-Rosenthal boxes). Using ACH and volume of room/house, estimated CADR per dollar varied 4x from below 80 cfm / \$100 for tested HEPA purifiers at their highest speed (for maximum CADR) up to above 350 cfm / \$100 run with tested DIY air purifiers running on their lowest speed (for reduced noise generation). Differences in CADR were observed in room versus house, and purifiers with higher airspeed had higher than expected CADR, possibly reflecting better mixing. Using 0.6 ACH as baseline for unventilated rooms, at least 12 ACH is required for far-field protection equivalent to N95 respirators (95%), and this ACH can be achieved using either HEPA or DIY air filtration in a room or building and verified with ambient aerosols.

## Introduction

Emulating N95 protection with air filtration (or ventilation) requires 95% reduction of particles at all distances from the airborne particulate source. However a CDC laboratory experiment [36] confirmed that in-room air filtration does not reduce exhaled breath exposure to simulated participants sitting very close to an infected person (near-field e.g. less than 6 feet) to the same degree as at a larger distance when air is well-mixed within the room (far-field). Respirators remain useful for reducing risk to both near-field and far-field exposures, whereas air filtration can only mitigate far-field exposure in a well-mixed environment, not near-field. Respirators may not always be used by everyone in many non-healthcare settings (e.g. schools, homes, offices). In such settings, both HEPA and lower-cost DIY air filtration can mitigate spread of SARS-Cov-2 and other viruses indoors [30] [40] by reducing far-field exposures in a room or building [42] [43] that may lead to super spreading events [37]. Covid and other viruses/bacteria, carcinogenic wildfire particles, allergens (e.g. pollen, dust), pollution (e.g. diesel soot, wood-burning), etc. can be present in the indoor air we breathe, and air changes per hour (ACH) measures how quickly these harmful particulates are removed by air filtration (or ventilation). Two questions emerge: how much ACH is actually needed to reduce far-field exposures to the same degree as an N95 respirator, and are there simple procedures to measure/check ACH in occupied rooms?

### **How much ACH is actually needed to reduce far-field exposures to the same degree as an N95 respirator?**

ACH is central to ventilation/filtration and is analogous to air pressure (PSI) in a car's tires. It's not good enough to say keep your tires inflated without a minimum PSI (pounds per square inch). In a car's tires, there is a big difference between 10 vs 20 vs 30 PSI. For example, top-heavy SUVs are more likely to roll over at 10 or 20 PSI than at 30 PSI. For hospitals, CDC specifies minimum ACH by type of room (e.g. airborne infection isolation room, surgery, etc.) in Table B.2 of [4]. Whereas CDC doesn't make such specific ACH recommendations in community settings (non-healthcare). For air filtration CDC recommends the so-called "2/3 rule" on their main page on ventilation page [5] (updated June 2, 2021) which is mathematically equivalent to 5 ACH. Elsewhere on this page CDC alludes to 6 ACH and higher as having higher airflow rates. A study in Italian classrooms observed a greater reduction in classroom infection rates with increasing ACH from ventilation: 40% at 2.4 ACH, 67% at 4 ACH, 83% at 6 ACH [2] [3]. The viability of the aerosolized SARS-Cov-2 virus decays naturally at some rate even if inactivated virus still physically lingers in the air. To reduce infection risk with air cleaning, the ACH needs to "outrun" this natural decay of viral viability indoors which can range from an equivalent of less than one ACH to several ACH depending on ambient conditions of sunlight, humidity, temperature and so on [48] [49] [50].

In general it takes a reduction of aerosol concentrations by 20 times to get the equivalent of 95% filtration as nominally required for N95 respirators. Miller et. al. [37] describes an approximation (Equation 3) for equilibrium viral particle concentration (C) with one or more

infected persons emitting virus at rate (E per hour) in a well-mixed room of volume (V) with ACH ( $\lambda$  per hour):  $C = E / (\lambda V)$ . In an unventilated room (the absence of any indoor ventilation or air filtration), the particle removal still includes surface deposition with a contribution to  $\lambda$  estimated in a wide range of 0.3 to 1.5 [37]. In experiments described below the ACH from surface deposition in a room was measured to be approximately 0.6. Assuming surface deposition contributes 0.6 to  $\lambda$ , 20 times reduction in aerosol concentrations to achieve N95-equivalent filtration at far-field in a well-mixed environment requires ACH ( $\lambda$ ) from air filtration to be 12.

Retrospective analysis showed that use of KN95/N95 respirators by both community members [32] and in healthcare settings [51] resulted in lower COVID infection rates as compared to cloth and surgical masks. Across a variety of manufacturers the average filtration efficiency of N95 at 0.3  $\mu\text{m}$  particle size was found to be much higher and more consistent at 98% than 81% for KN95 [33]. This 98% is reassuringly higher than the 95% filtration efficiency nominally required for N95, although N95 fit [34] and filtration efficiency (Figure 2 of [35]) may degrade with reuse over several hours, and wearing an N95 with poor fit is like closing the windows of a car door but leaving a crack open. The N95 average of 98% requires a 50 times reduction in inhaled aerosols (ACH=30) and KN95 average of 80% requires 5 times (ACH=3) in an unventilated room assuming surface deposition contributes 0.6 to ACH ( $\lambda$ ).

One study in 2017 found a cross section of recently constructed schools implemented approximately 2 ACH with HVAC on, and 0.2 ACH with HVAC off [38]. Whereas houses, offices, and other structures with temperature-sensitive fan operation to conserve energy may result in ACH closer to the surface deposition approximation.

### **How can ACH be measured or checked in occupied rooms or buildings?**

The amount of filtration (or ventilation) that is required as a function of a chosen target ACH in a room is known as the clean air delivery rate (CADR). In case of air purifiers the number needed (predicted) can then be calculated from room volume and ACH in three steps:

Step 1: room vol. = length. x width x height (cf).

Step 2: CADR needed (cfm) = vol. x ACH needed / 60.

Step 3: # of purifiers = (CADR needed) / (CADR per purifier).

For a typical classroom (30'x30'x10') if ACH needed = 6, then CADR needed = 900 cfm. As a rule of thumb, 100 cfm per 1000 cf is needed to meet 6 ACH and double that for 12 ACH.

However, installing and running air filtration based on provisioning sufficient CADR to meet the desired ACH does not guarantee that the desired ACH level will be achieved. Many real-world factors can reduce ACH below the estimated levels including purifier design and aerodynamics, purifier placement, and other non-ideal effects such as leaks in the building allowing airborne

pollutants to enter from outdoor air. It is therefore useful to check and verify the ACH actually achieved in a room or building by the air filtration system.

As a model, the University of San Diego transparently lists the ACH measured in each classroom [41]. Tracking the removal of an airborne contaminant as a function of time can be used to measure ACH with a standard procedure using aerosols generated from salt water [29], burning incense [31], or extreme aerosol concentrations present during wildfire smoke events [39]. For example, based on the formula provided by CDC, the time it takes to remove 90% of an airborne contaminant is 69 minutes at 2 ACH, 35 minutes at 4 ACH, 23 minutes at 6 ACH, and 12 minutes at 12 ACH [1]. Waiting for extreme events, or generating aerosols is cumbersome and generally not possible in occupied rooms such as a classroom or home.

The technique to verify ACH in a room or building, described in detail below, relies on ambient aerosols to measure ACH from surface deposition and with air filtration in a room and a whole house (multi-room). It may be generalized to any indoor space which does not have very high amounts of outdoor air entering and for which the air filtration is capable of reducing the ambient aerosols inside once windows are closed (such as open windows or an extremely high rate of outside ventilation).

## Safety notes

These safety notes are included here from [30]. “California Air Resource Board recommends never leaving box-fan air filters unattended while turned on, and to use box fans manufactured after 2012 and are clearly identified with the UL or ETL safety markings because it is likely they have a fused plug to prevent electrical fires e.g. if the device is inadvertently knocked over [45]. Chemical Insights, a subsidiary of Underwriters Laboratories, recently tested five different electric box fan models (approximately 20" × 20" in size) with attached air filters and concluded that all measured temperatures fell below the maximum acceptable thresholds defined by the market safety standard for electric fans [46]. In detail, in addition to assessing DIY fans with clean MERV 13 filters, DIYs were tested with filters loaded with two types of particles (ASHRAE dust and smoke from biomass burning to represent a loaded filter due to a wildfire), and test scenarios also included fully sealing the box fans in plastic and running fans for over 7 hours face-down on the floor. Even under those scenarios, the fans' surface components did not reach temperatures that would cause minor burn/injury, and all fan models were able to operate continuously throughout all test scenarios without reaching UL 507 thresholds. The resources and information in this article (the “Content”) are for informational purposes only and should not be construed as professional advice. The Content is intended to complement, not substitute, the advice of your doctor. You should seek independent professional advice from a person who is licensed and/or qualified in the applicable area. No action should be taken based upon any information contained in this article. Use of the article is at your own risk. Patient Knowhow, Inc. takes no responsibility and assumes no liability for any Content made available in this article.”

## Methods

### Procedure

To measure the ACH of air filtration (HEPA or DIY) in an indoor space such as a room or a whole house, first ambient aerosols from outdoors are allowed to enter the indoor space by opening windows and doors and get close to the level outdoors as measured by the optical particle counter described below. Then the windows are closed, and then finally the air filtration is turned on to track the decay of indoor aerosol concentrations with an optical particle counter. The shape of the decay curve and asymptote reveal the ACH and leaks of outdoor aerosols into the room or whole house.

### Measurement of ambient aerosol concentration

At each point in time, the aerosol concentrations (count per liter) for 0.3  $\mu\text{m}$  particle size were tested using an ISO-certified, particle counter (Temptop Particle Counter PMD 331). Each measurement was conducted in the center of the room or house for 30 seconds.

### Measurement of noise generated by air purifiers

Noise was measured for each air purifier/filter using an iPhone app [44] maintained by The National Institute for Occupational Safety and Health (NIOSH) at a 9" distance perpendicular to the direction of the output airflow.

### Measurement of maximum airspeed of air purifiers

For each HEPA-purifier or DIY box fan filter, the airspeed was measured using an anemometer (BTMETER BT-100 Handheld Anemometer available) held at the output perpendicular to the airflow. The maximum three or more airspeed measurements (feet per minute) in different locations at the fan output was used.

### Air purifiers and their placement

Air purifiers of different types were placed inside a single room or entire house for each test of ACH. The purifiers were DIY (box fan and filter) and commercial HEPA as described in detail in [30]. Step by step instructions to make the DIY air purifiers are in [40] which includes an aluminum screen for child safety that is expected to reduce CADR slightly by approximately 10%. DIY air purifiers were run on lowest speed #1 and HEPA were run on maximum (#3 or #4) unless otherwise noted. Estimated costs and noise generated are shown in brackets.

The room is estimated to be 2961 cubic feet with different air purifiers placed in the same locations, doors closed, windows closed, HVAC turned off.

- **Surface (\$0, 38 dBA, 0 lbs):** No air filtration or HVAC ventilation with windows closed (to measure surface deposition)

- **Coway (\$494, 63 dBA, 25 lbs):** A HEPA Coway Airmega 400 at speed #3
- **Smart Health (\$999, 53 dBA, 69 lbs):** One HEPA Smart Health Blast at maximum speed
- **Levoit (\$299, 66 dBA, 14 lbs):** A HEPA Levoit Core 600s at maximum speed (#4)
- **Honeywell (\$129, 62 dBA, 14 lbs):** A HEPA Honeywell HPA5100B at maximum speed (Turbo)
- **Lasko (\$69, 55 dBA, 11 lbs):** A Lasko Air Flex air purifier -- box fan with integrated MERV 10 filter at lowest speed (1)
- **One Lennox (\$160, 58 dBA, 10 lbs):** A 1-filter DIY 5" Lennox MERV 16 at lowest speed (#1)
- **Two Lennox (\$320, 61 dBA = 3dB + 58 dBA, 20 lbs):** Two 1-filter DIY 5" Lennox MERV 16 at lowest speed (#1)
- **3M (\$70, 58 dBA, 8 lbs):** A 1-filter DIY 1" 3M Filtrete MERV 14 at lowest speed (#1)
- **Nordic Pure (\$55, 58 dBA, 8 lbs):** A 1-filter DIY 2" Nordic Pure MERV 13 at lowest speed (#1)
- **Nordic Pure (\$100, 57 dBA, 8 lbs):** A 4-filter DIY 2" Nordic Pure MERV 13 (Corsi-Rosenthal box) at lowest speed (#1)

The three story house is estimated to be 17,800 cubic feet. For comparison purposes, the different air purifiers were placed in the same locations in different interconnected rooms, inside doors open, windows and outside doors closed, HVAC turned off.

- **Coway at speed 3 (63 dBA), 2 (55 dBA), 1 (\$39 dBA):** Nine HEPA Coway Airmega 400 and one Coway AP-1512 where fan speed is varied 3 to 2 to 1
- **Lennox (58 dBA):** Ten DIY 5" Lennox MERV 16 at lowest speed (#1)
- **3M (58 dBA):** Ten DIY 1" 3M Filtrete MERV 14 at lowest speed (#1)
- **Nordic Pure (58 dBA):** Ten DIY 2" Nordic Pure MERV 13 at lowest speed (#1)

### **Model for ambient aerosol decay with air filtration in enclosed indoor space**

The mathematical model for aerosol concentration from an infected person in a room that was described in [37] can be adapted to measure ACH in a whole house or room after any ambient (or generated) aerosol has been introduced. The differential equation (Equation 2) is the same, but in contrast to the rising solution that asymptotically approaches  $C = E/\lambda V$  given in [37], the ambient aerosol concentration in the room or house at time  $t$  after windows are closed can be expressed as the alternate (decaying) solution to the same differential equation:

$$C(t) = (E/\lambda V) + [C(0) - E/\lambda V] \times \exp(-\lambda t).$$

where

$C(t)$  = ambient aerosol concentration at time  $t$

$C(0)$  = initial concentration

$E$  = rate of ambient aerosols "leaking" into room or house (per hour) e.g. from outside

$V$  = volume of room or house

$\lambda$  = ACH

exp = exponential function.



## Estimation of ACH and rate of indoor leakage

All measurements (counts) were input into Google Sheets and compared to the model for ambient aerosol decay with different values of ACH and indoor aerosol leak rate. The aerosol concentration measurements representing  $C(t)$  are fitted by a computer program (written in Python) to obtain the best approximation for ACH ( $\lambda$ ) and the rate of indoor leak ( $E/V$ ) at  $0.3\ \mu\text{m}$  particle size by minimizing sum of percent error across each measurement (in increments of 0.1 ACH and 100 particles per liter per hour). For example, Figure 1 shows the best fit for surface deposition in the room with windows closed and without any filtration or HVAC enabled. Figure 2 shows a plot of the best fit obtained for the Coway Airmega 400 in the Room with 7.7 ACH and leak equal to 4700 particles per liter per hour.

**Figure 1: Example of best fit with 0.6 ACH the rate of surface deposition in Room**

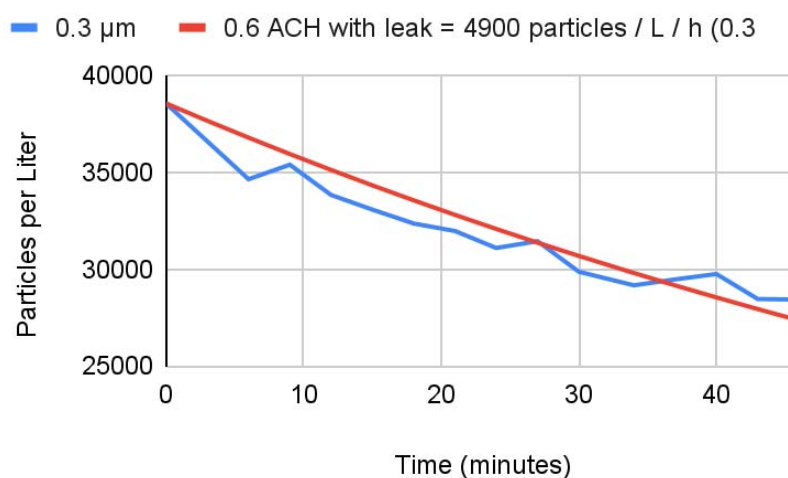

**Figure 2: Example of best fit with 7.7 ACH for Coway Airmega 400 in Room**

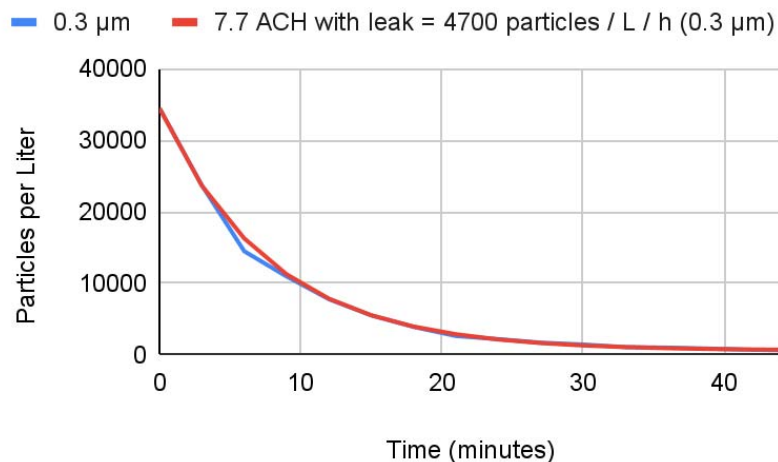

## Results

The ACH measured for each purifier in the room is shown in Figure 3, and for those tested with the purifiers in the whole house in Figure 4.

**Figure 3: ACH measured for each purifier in single room**

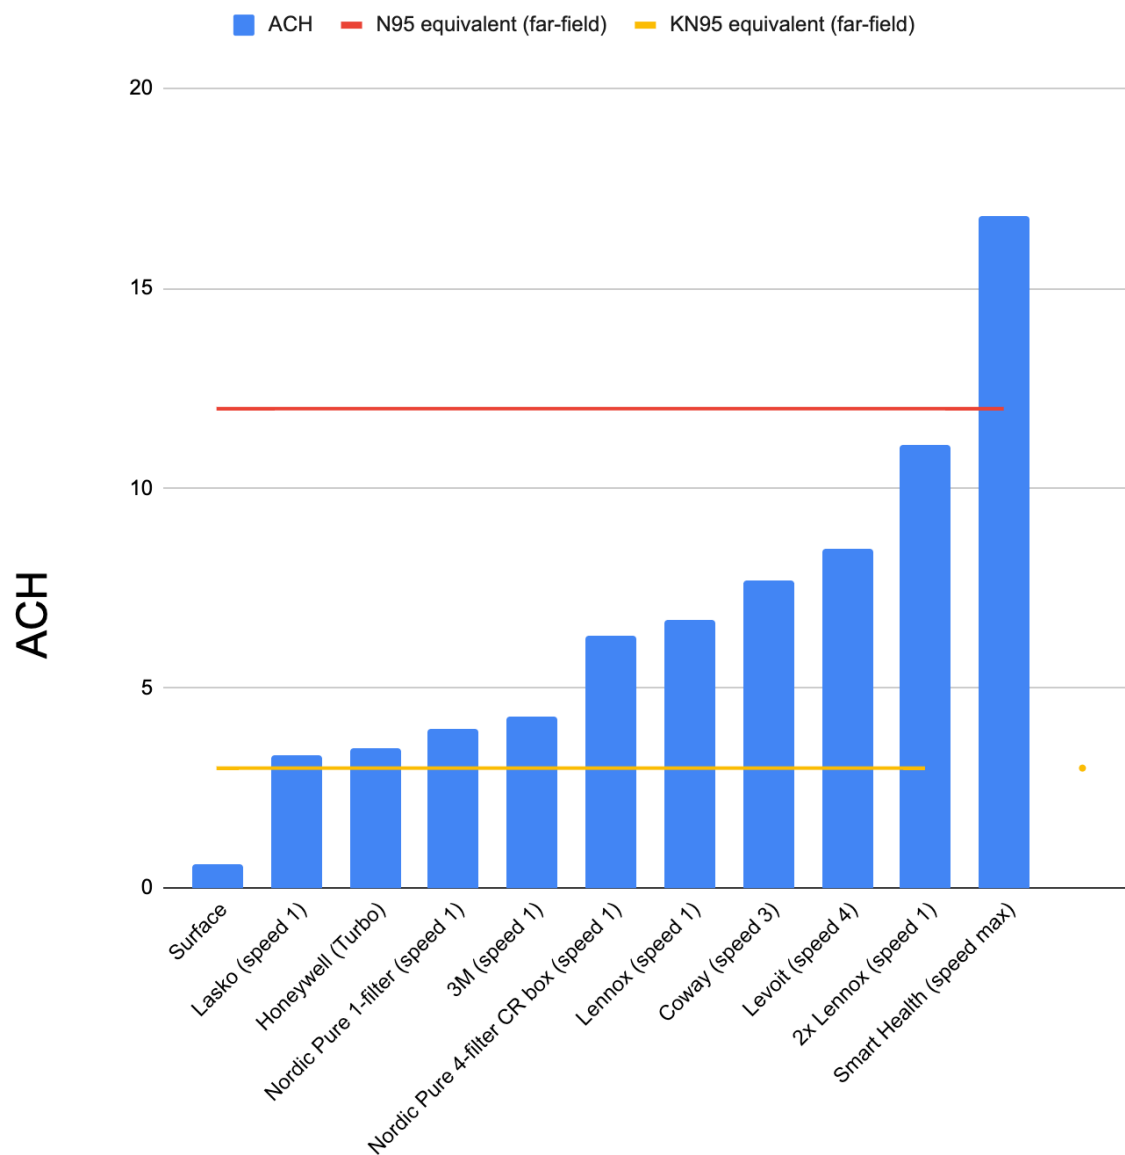



**Figure 4: ACH measured for 10 purifiers in whole house**

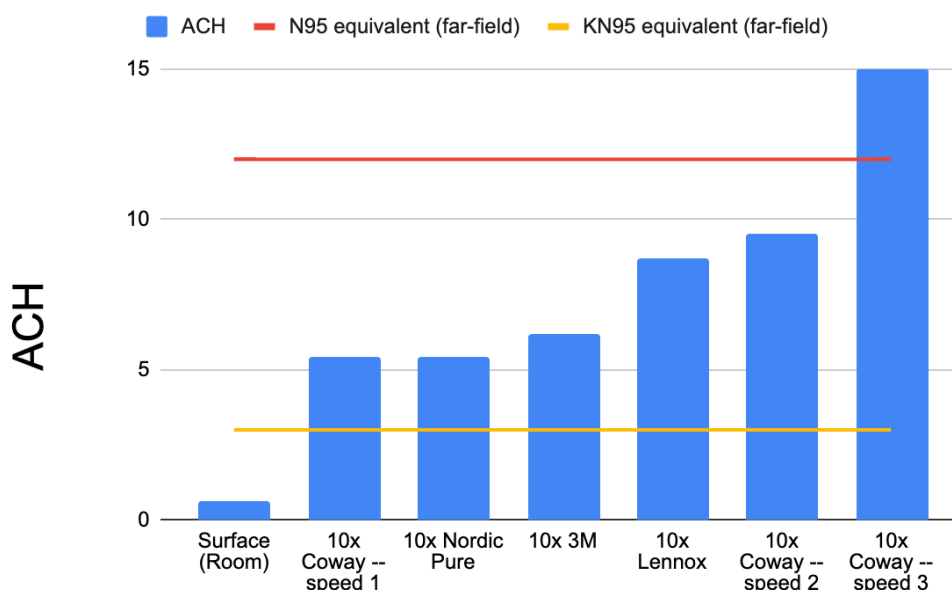

The clean air delivery rate of each purifier may be estimated based on measured ACH and estimates of the volume of the room and house ( $CADR = \text{Volume} \times \text{ACH} / 60 / \# \text{ of purifiers}$ ) as shown in Figure 5 which is compared to the cost of each purifier.

**Figure 5: ACH-derived estimate of CADR (cfm) and Cost per purifier**

ACH-derived CADR (cfm) @ 0.3  $\mu\text{m}$  and Cost

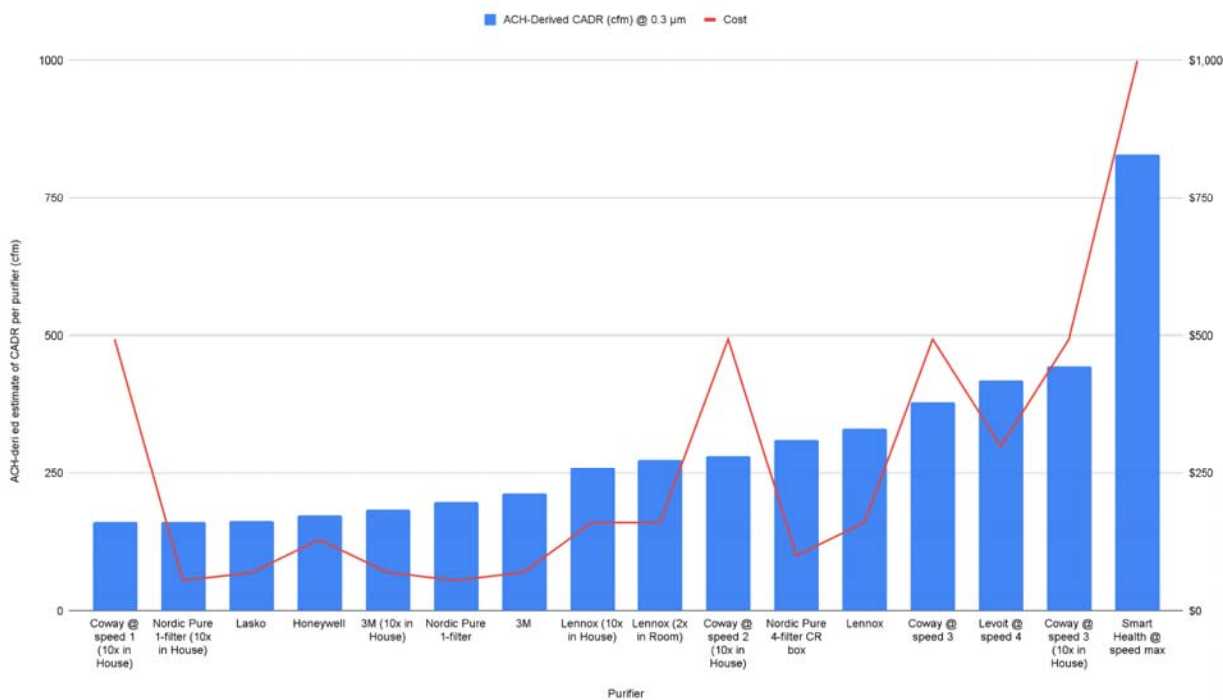

For each purifier, ACH-derived CADR and cost are compared to other relevant metrics in Table 1: cost-efficiency (CADR per \$100), noise generated (dBA), weight (lbs), and volume (cubic feet).

**Table 1: ACH-derived CADR, Cost, Cost-efficiency, Noise generated, Weight, Volume**

| Purifier                       | ACH-Derived CADR (cfm) @ 0.3 $\mu$ m | Cost  | CADR (cfm) per \$100 | Noise generated (dBA) | Weight (lbs) | Volume (cubic feet) |
|--------------------------------|--------------------------------------|-------|----------------------|-----------------------|--------------|---------------------|
| Nordic Pure                    | 197.4                                | \$55  | 358.91               | 58                    | 8.00         | 1.8                 |
| Nordic Pure 4-filter           | 310.905                              | \$100 | 310.91               | 57                    | 8.00         | 6.60                |
| 3M                             | 212.205                              | \$70  | 303.15               | 58                    | 8.00         | 1.50                |
| Nordic Pure (10x in House)     | 160.38                               | \$55  | 291.60               | 58                    | 8.00         | 1.80                |
| 3M (10x in House)              | 184.14                               | \$70  | 263.06               | 58                    | 8.00         | 1.5                 |
| Lasko                          | 162.855                              | \$69  | 236.02               | 55                    | 11.00        | 1.70                |
| Lennox                         | 330.645                              | \$160 | 206.65               | 58                    | 10.00        | 2.40                |
| Lennox (2x in Room)            | 273.8925                             | \$160 | 171.18               | 58                    | 10.00        | 2.40                |
| Lennox (10x in House)          | 258.39                               | \$160 | 161.49               | 58                    | 10.00        | 2.40                |
| Levoit @ speed 4               | 419.475                              | \$299 | 140.29               | 66                    | 14.00        | 2.00                |
| Honeywell                      | 172.725                              | \$129 | 133.90               | 62                    | 14.00        | 1.10                |
| Coway @ speed 3 (10x in House) | 445.5                                | \$494 | 90.18                | 63                    | 25.00        | 3.00                |
| Smart Health @ speed max       | 829.08                               | \$999 | 82.99                | 53                    | 69           | 6.4                 |
| Coway @ speed 3                | 379.995                              | \$494 | 76.92                | 63                    | 25.00        | 3.00                |
| Coway @ speed 2 (10x in House) | 282.15                               | \$494 | 57.12                | 55                    | 25.00        | 3.00                |
| Coway @ speed 1 (10x in House) | 160.38                               | \$494 | 32.47                | 39                    | 25.00        | 3.00                |

Figure 6 shows the percent difference between ACH-derived CADR and the expected CADR reported by the manufacturer of HEPA purifiers and derived from airflow/efficiency measurements for DIY purifiers in [30]. Figure 6 also compares this percent difference to the maximum airspeed (ft/min) measured at the output of each purifier.

**Figure 6: Percent difference between expected CADR and ACH-derived CADR compared to maximum airspeed for each purifier**

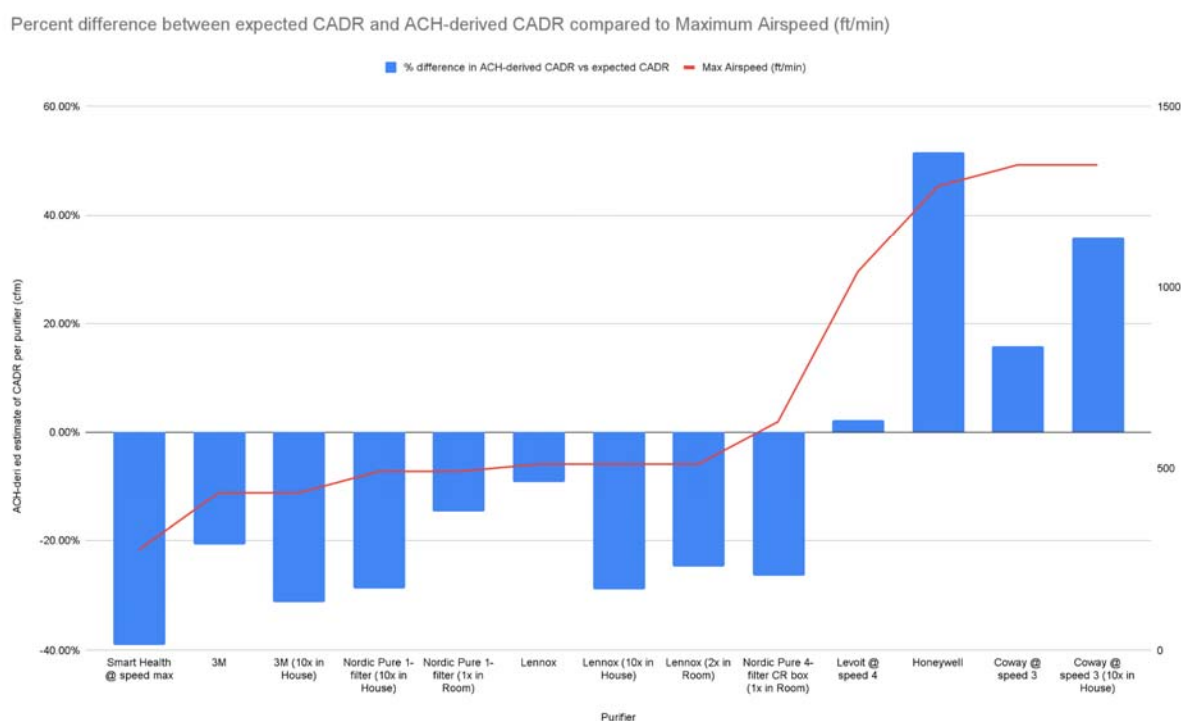

## Limitations

These are included here from [30]. “Although SARS-Cov-2 is extremely small (approximately 100 nm in diameter [47], it may be exhaled in respiratory aerosols and droplets that are much larger (several hundreds of nanometers to several microns). The research on which are the most common COVID transmission modes (aerosol, droplet, or surfaces), and what is the most common aerosol particle sizes by which it is transmitted continues to evolve as new variants emerge. One potential limitation is in extrapolating results from the ambient test aerosols used in this study to real-world applications for removal aerosols relevant to SARS-Cov-2. Filtration efficiency and CADR results from DIY air cleaners highlight potential performance differences between filters made by different manufacturers of comparably rated MERV 13, 14, and 16 filters. Hence, filter selection is critical to achieving the results desired. There may also be

variability in filter performance due to manufacturing defects or variations among fans and filters from the same manufacturer. The long-term durability of filtration efficiency and airflow of these filters after extended use with box fans is also uncharacterized unlike HEPA-purifiers which have a well-understood operational history.” Also see limitations of the optical particle counter in the Limitations section of [30].

## Discussion

The experimental results summarized in Figures 3 and 4 demonstrate that ACH with or without air filtration can be measured (checked) in both a single room and a whole building, respectively, by tracking the rate of decay of ambient aerosols present inside. Adding two identical Lennox purifiers in the room nearly doubled the ACH to 11 from 6.7 compared to one Lennox purifier as seen in Figure 3. The different fan speeds of the Coway purifiers (1,2,3) in the house are reflected in the ratio of approximately 1:2:3 (5.4 to 9.5 to 15) as seen in Figure 4. As shown in Figure 5, the effective CADR and cost for each purifier can also be estimated based on measured ACH and estimates of the volume of the room and house.

For each of the DIY purifiers, the ACH-derived CADR averaged across 10 units in the house was slightly lower than that measured with a single unit in the room (-22% for Lennox, -13% for 3M, -19% for Nordic Pure), whereas it was the higher for the Coway HEPA purifiers (+17%). In all cases the differences were within 25%, but these the differences may reflect differences in placement and orientation of the purifiers within each room of the house.

The ACH-derived CADR for DIY air purifiers and for one of the HEPA purifiers was lower than that expected from airflow/efficiency measurements in [30] in case of DIY and those reported by that manufacturer in case of HEPA, but it was also significantly higher for the remaining HEPA purifiers. One possible explanation may be the maximum airspeed (not airflow) measured at the output of each of the purifiers as shown in Figure 6. The purifiers with higher airspeed may contribute to higher rates of mixing within the room resulting in higher rate of air cleaning and observed CADR, and conversely lower airspeed may contribute to lower mixing resulting in some degree of recirculation of clean air nearby the purifier back into its input. This points to a possible way to improve DIY air purifier design is to enhance the airspeed in order to promote better mixing.

Table 1 compares the CADR (cfm) per \$100 and noise generated for each of the purifiers which varies by a factor of over 4x among the HEPA and DIY air purifiers. Although a HEPA purifier produced the highest CADR and least noise, the highest CADR per \$100 was for a DIY air purifier at a lower noise level, weight, and volume than many of the tested HEPA purifiers. Consistent with CADR estimates based on airflow/efficiency in [30], the ACH-derived CADR for the four-filter DIY purifier (Nordic Pure) known as the Corsi-Rosenthal box (311 cfm) was approximately 50% more than the single-filter version (197 cfm). HEPA purifiers that are bulky or heavy can be hard to bring to hotel rooms or for temporary use in large gatherings. Portable (< 10 lbs, 1-3 cubic feet) and easy-to-assemble DIY air cleaning can come in handy for these purposes.

ASHRAE minimum outdoor air rates set forth in 62.1-2019 for non-healthcare facilities are meant for removal of common indoor contaminants but may not be sufficient to achieve a desired level of infection risk reduction [6]. For a typical classroom (30'x30'x10'), 62.1-2019 says add per-person minimum (25 x 10 = 250 cfm) to per-area minimum (900 sf x 0.12 = 108 cfm) which equals 358 cfm or 2.4 ACH. To achieve suitable risk reduction for infection control, the ASHRAE Epidemics Task force suggests additional steps most likely needed but ASHRAE does not appear to make minimum recommendations for these steps [7]. Although a 2020 version of this same document recommended a 2 ACH minimum ("2 rotations/hour") which was linked to in April, 2022 by Michigan.

As shown in the map below, at least 19 states across the US have independently issued their own ACH guidelines or linked to recommendations from CDC or ASHRAE noted above. Although the laws of physics/chemistry/biology are the same in 50 states, there a wide range of ACH recommendations ranging from 2 to 12.

**Figure7: ACH levels recommended for air filtration in 19 states across the USA**

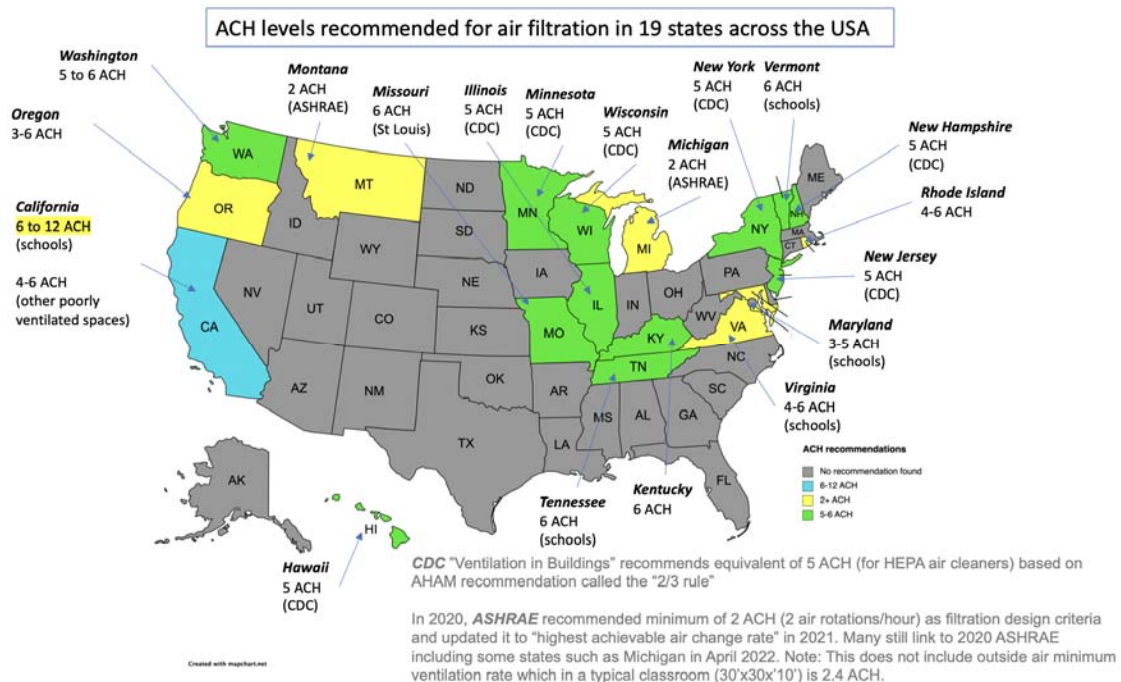

- California recommends 6-12 ACH for schools [10], and only recommends 4-6 ACH for other poorly ventilated indoor spaces [11]
- Hawaii refers to CDC (5 ACH) [12]
- Illinois refers to CDC (5 ACH) [13]
- Kentucky recommended 6 ACH for schools, "All day: Program system to run terminal unit fans (classroom unit fans) continuously (don't cycle them on and off) to provide more than six air changes per hour of MERV-13 filtered air." [14]

- Maryland recommended "~3-5 per hour" or 3-5 ACH for schools [15]
- Michigan refers to ASHRAE (2020) for schools (2 ACH based on 2020 guidance) [9]
- Minnesota refers to CDC (5 ACH) [16]
- Missouri (St. Louis) recommended 6 ACH [17]
- Montana refers to ASHRAE for schools (2 ACH based on 2020 guidance) [18]
- New Jersey refers to CDC (5 ACH) [19]
- New Hampshire refers to CDC (5 ACH) [20]
- New York refers to CDC (5 ACH) for schools [21]
- Oregon recommends 3-6 ACH [22]
- Rhode Island recommends 4-6 ACH [23]
- Tennessee recommends 6 ACH [24]
- Virginia recommends 4-6 ACH for schools [25]
- Vermont recommends 6 ACH for schools [26]
- Washington recommends 5-6 ACH [27]
- Wisconsin refers to CDC (5 ACH) [28]

The results of this study demonstrate that the wide range of 5 to 12 ACH as recommended by federal and state public health agencies (CDC, CDPH, etc.) is achievable with one or more HEPA / DIY air purifiers in each room, and the level of ACH can be checked or verified using ambient aerosols (Figure 1). However based on the measurement of 0.6 ACH for surface deposition, at least 12 ACH would be required to reduce far-field exposures and emulate protection of N95 respirators (95%) with higher ACH for greater margins of safety. At least 3 ACH would be needed to emulate the protection from a typical KN95.

## Declaration of interests

I am not associated with any of the manufacturers mentioned in this research.

## References

- [1] <https://www.cdc.gov/infectioncontrol/guidelines/environmental/appendix/air.html>
- [2] <https://www.fondazionehume.it/data-analysis/controlled-mechanical-ventilation-cmv-works/>
- [3] <https://arxiv.org/abs/2207.02678>
- [4] <https://www.cdc.gov/infectioncontrol/guidelines/environmental/appendix/air.html>
- [5] <https://www.cdc.gov/coronavirus/2019-ncov/community/ventilation.html>
- [6] [https://www.ashrae.org/file%20library/technical%20resources/covid-19/may2021\\_18-21\\_ieq\\_bahnfleth.pdf](https://www.ashrae.org/file%20library/technical%20resources/covid-19/may2021_18-21_ieq_bahnfleth.pdf)

[7] <https://www.ashrae.org/file%20library/technical%20resources/covid-19/ashrae-reopening-schools-and-universities-c19-guidance.pdf>

[8] [https://images.magnetmail.net/images/clients/ASHRAE/attach/ashrae\\_reopening\\_schools\\_and\\_universities\\_c19\\_guidance.pdf](https://images.magnetmail.net/images/clients/ASHRAE/attach/ashrae_reopening_schools_and_universities_c19_guidance.pdf)

[9] <https://www.michigan.gov/coronavirus/-/media/Project/Websites/coronavirus/k12-Schools/COVID-19-Guidance-for-Operating-Schools-Safely---April-2022.pdf>

[10] [https://www.cdph.ca.gov/Programs/CCDPHP/DEODC/EHLB/IAQ/CDPH%20Document%20Library/School\\_ventilation\\_and\\_filtration\\_ADA.pdf](https://www.cdph.ca.gov/Programs/CCDPHP/DEODC/EHLB/IAQ/CDPH%20Document%20Library/School_ventilation_and_filtration_ADA.pdf)

[11] <https://www.cdph.ca.gov/Programs/CID/DCDC/Pages/COVID-19/Interim-Guidance-for-Ventilation-Filtration-and-Air-Quality-in-Indoor-Environments.aspx>

[12] <https://health.hawaii.gov/coronavirusdisease2019/files/2021/08/COVID-19-Guidance-for-Schools.pdf>

[13] <https://dph.illinois.gov/covid19/community-guidance/ventilation-filtration-air-cleaning.html>

[14] <https://education.ky.gov/comm/Documents/Ventilation%20Final.pdf>

[15] [https://health.maryland.gov/phpa/Documents/COVID-19%20TA%20for%20Schools\\_8.19.21%20v2.pdf](https://health.maryland.gov/phpa/Documents/COVID-19%20TA%20for%20Schools_8.19.21%20v2.pdf)

[16] <https://www.health.state.mn.us/diseases/coronavirus/indoorair.html>

[17] <https://www.stlouis-mo.gov/government/departments/health/communicable-disease/covid-19/guidance/upload/Ventilation-Guidance-1-7-2022.pdf>

[18] <https://dphhs.mt.gov/assets/publichealth/Asthma/COVID-19/HEPAAirPurifiersSchoolsCOVID19.pdf>

[19] [https://www.state.nj.us/health/ceohs/documents/ceohs%20content/NJDOH\\_Ventilation\\_Indoor\\_Spaces.pdf](https://www.state.nj.us/health/ceohs/documents/ceohs%20content/NJDOH_Ventilation_Indoor_Spaces.pdf)

[20] <https://www.covid19.nh.gov/sites/g/files/ehbemt481/files/inline-images/universal-best-practices.pdf>



[21] <http://www.nysed.gov/common/nysed/files/programs/back-school/nysed-health-and-safety-guide-for-the-2021-2022-school-year.pdf>

[22] [https://sharedsystems.dhsoha.state.or.us/DHSForms/Served/le3725\\_R.pdf](https://sharedsystems.dhsoha.state.or.us/DHSForms/Served/le3725_R.pdf)

[23] <https://covid.ri.gov/covid-19-prevention/indoor-air-circulation>

[24] [https://www.tn.gov/content/dam/tn/health/documents/healthy-places/healthy-schools/HSW\\_School\\_IAQ\\_Fact\\_Sheets\\_Compiled.pdf](https://www.tn.gov/content/dam/tn/health/documents/healthy-places/healthy-schools/HSW_School_IAQ_Fact_Sheets_Compiled.pdf)

[25] <https://www.apsva.us/maintenance/return-to-school-classroom-capacity/>

[26] <https://education.vermont.gov/sites/aoe/files/documents/edu-health-and-safety-faq-8-hvac.pdf>

[27] <https://doh.wa.gov/sites/default/files/legacy/Documents/1600/coronavirus/VentilationGuidance.pdf>

[28] <https://www.dhs.wisconsin.gov/covid-19/employers.htm>

[29] <https://www.sciencedirect.com/science/article/pii/S2590088921000597>

[30] <https://www.sciencedirect.com/science/article/pii/S0048969722029813>

[31] <https://www.nytimes.com/wirecutter/reviews/best-air-purifier/>

[32] <https://www.cdc.gov/mmwr/volumes/71/wr/mm7106e1.htm>

[33] <https://bmcinfectdis.biomedcentral.com/articles/10.1186/s12879-021-06008-8/tables/2>

[34] [https://www.bjanaesthesia.org/article/S0007-0912\(20\)30480-3/fulltext](https://www.bjanaesthesia.org/article/S0007-0912(20)30480-3/fulltext)

[35] <https://www.ncbi.nlm.nih.gov/pmc/articles/PMC9301359/>

[36] <https://www.ncbi.nlm.nih.gov/pmc/articles/PMC8707272/>

[37] <https://onlinelibrary.wiley.com/doi/10.1111/ina.12751>

[38] <https://pubmed.ncbi.nlm.nih.gov/28370427/>

[39] <https://aaqr.org/articles/aaqr-21-03-tn-0046>

[40] <https://www.patientknowhow.com/safe.html>

- [41] <https://www.sandiego.edu/onward/classroom-air-quality.php>
- [42] <https://www.ncbi.nlm.nih.gov/pmc/articles/PMC8798678/>
- [43] [https://wwwnc.cdc.gov/eid/article/26/7/20-0764\\_article](https://wwwnc.cdc.gov/eid/article/26/7/20-0764_article)
- [44] <https://www.cdc.gov/niosh/topics/noise/app.html>
- [45] <https://ww2.arb.ca.gov/protecting-yourself-wildfire-smoke>
- [46] <https://chemicalinsights.org/wp-content/uploads/DIY-Box-Fan-Report-2021.pdf>
- [47] <https://elifesciences.org/articles/57309>
- [48] <https://www.nejm.org/doi/full/10.1056/NEJMc2004973>
- [49] <https://academic.oup.com/jid/article/222/4/564/5856149>
- [50] <https://www.pnas.org/doi/10.1073/pnas.2200109119>
- [51] <https://jamanetwork.com/journals/jamanetworkopen/fullarticle/2795150>
